# Supplementary material for: Exploring Mindfulness and Language Learning: EFL Students’ Journey Coping with Speaking Anxiety
Source: Research Square preprint supplement (doi:10.21203/rs.3.rs-7592142/v1), 2025-10-22
Supplement: Supplementary file 1 [file 514a2a14b9836c3f2f18a411.docx]

**Supplementary Material 2**

EFL students’ perceptions of MBI-FLC

| **Codes** | **Frequency** | **Quotes** |
| --- | --- | --- |
| Continued practice | 13 | S2: “I continue to practice mindful eating. As I said, that taste… you know, for example, I cook a meal. According to mindfulness, I would like to practice it by closing my eyes and feeling it.”  S3: “So, I can't say anything about the others, but there is only one thing I will definitely continue: Mindful breathing. I don't plan on leaving it.”  S5: “We wrote something we were grateful for every day for a week. I think I will do that from now on…..I mean, I think it will be a good thing for me. When I look at it after a few months, just to remember...I think I can do that....because I'm a very forgetful person, I don't really remember the good things that happened during the day or the things I'm grateful for. But at the end of 6 days, for example, when I look at what I wrote, I think that it went well, I did this and that. That's why I would like to continue this exercise from now on.”  S12: “I’ll continue the mindful breathing exercise. I was already doing it before, I stopped and I'm thinking of doing it again. Because it helps me a lot.”  S14: “I’d like to continue practicing loving-kindness meditation.” |
| Liked activities | 9 | S6: “Well, mindful breathing exercise was nice. And mindful eating, but I couldn't participate in it. Then I watched your recording; it was good, too.”  S13: “For example, there was this mindful breathing. It helped me, I liked it. Mindful eating, for example, I liked that too. Then, there were short stories, and you were reading them (meditations). Some words helped me there.”  S15: “Even though I am skinny, I eat a lot. Mindful eating caught my attention and became one of the exercises that appealed to me.” |
| Increased awareness | 6 | S2: “I think I realized something inside and outside myself a little bit during these 8 weeks.”  S3: “First of all, breathing exercise…. It added something better to our life….Then this gratitude....taking notes of all the activities we do daily, the good things in our lives that day, and then opening and reading them to make ourselves happy when we suddenly feel bad... So doing these brings awareness to me, and it did, for example, while doing homework.”  S12: “As I said at the beginning, I realized some things after the program. For example, I didn't realize that the heat made me angry, but now I say that it makes me angry. Or the harmony of any vegetable I eat with this mouth-chewing movement, etc. Now I immediately think of the things we did in this program. I realized these.” |
| Negative / neutral perception | 6 | S3: “...we did the mindful eating exercise.... actually a little more carefully. Normally, we eat every day in the morning, at noon or in the evening. We eat at every moment of our day, but I don't know, I couldn't see any difference in this exercise regarding eating experience. Even though we ate more carefully, this mindful eating exercise did not raise awareness for me.”  S14: “Yes, I liked the program. But the lessons confused me a little. I couldn't attend most of the lectures, but I watched them all at once. I was confused and couldn't understand. I think it would have been better now if I had attended classes on time. I could understand and learn meditation better.”  S15: “Mindful breathing didn't really appeal to me. I'm not a person who can stay still very much. Well, I need to move every 5 seconds. That's why it wasn't really for me.” |
| Stress reduction | 4 | S1: “I was stressed most of the time. A word would suddenly come out, it was a little stressful to speak. But this program helped me become a little more relaxed. There is still stress, but a little.”  S5: “I have only tried mindful breathing practice a few times when I was angry. And I saw the effect, I mean it relaxes me, breathing in and out, I mean doing it that way, trying to focus on something.” |
