# Supplementary material for: Exploring Mindfulness and Language Learning: EFL Students’ Journey Coping with Speaking Anxiety
Source: Research Square preprint supplement (doi:10.21203/rs.3.rs-7592142/v1), 2025-10-22
Supplement: Supplementary file 2 [file c6e24206299cf0fe68f6ea7c.docx]

**Supplementary Material 1**

Weekly schedule of MBI-FLC

| **Week** | **Date** | **Focused area** | **Name of the activity** | **Homework** |
| --- | --- | --- | --- | --- |
| **1** | April 3rd 2023 | Awareness of sensations | *Introducing mindfulness (reading & writing)  *Mindful breathing | *REFLECTION 1: How did you feel after mindful breathing meditation?  *Mindful breathing |
| **2** | April 10th 2023 | Awareness of sensations | *Mindful breathing  *Where does chocolate come from? (reading & writing)  *Mindful eating | *REFLECTION 2: How did you feel after mindful eating?  *Mindful breathing  *Write about a routine activity done in a mindful way (JOURNAL 1) |
| **3** | April 17th 2023 | Awareness of sensations | *Mindful breathing  *Watching a short video about body scan exercise (listening & speaking)  *Body scan  *Mindful movement | *REFLECTION 3: How did you feel after body scan and mindful movement exercise?  *Mindful breathing  *ALTERNATIVELY: Mindful movement/Body scan |
| **4** | April 24th 2023 | Awareness of thoughts | *Mindful breathing  *The value of present moment  (reading & speaking) | *Mindful breathing  *ALTERNATIVELY: Body scan/Mindful eating/Mindful movement |
| **5** | May 1st 2023 | Awareness of thoughts | *Mindful breathing  *Labelling thoughts-wolf story  (listening & speaking) | *Mindful breathing  *ALTERNATIVELY: Body scan/Mindful movement/Mindful eating |
| **6** | May 8th 2023 | Awareness of emotions | *Mindful breathing  *5,4,3,2,1 Gratitude (speaking) | *REFLECTION 4: How did you feel after the gratitude activity?  *Mindful breathing  * ALTERNATIVELY: Body scan/Mindful movement/Mindful eating  *Write one thing that you are grateful for the next 6 days. On the seventh day, complete the gratitude journal. (JOURNAL 2) |
| **7** | May 15th 2023 | Awareness of emotions | *Mindful breathing  *Giving reaction to different situations (writing & speaking)  *Loving-kindness meditation | *REFLECTION 5: How did you feel after the loving-kindness meditation?  *Mindful breathing  *ALTERNATIVELY: Body scan/Mindful movement/Mindful eating/ Loving-kindness meditation |
| **8** | May 22nd 2023 | Wrap-up | *Mindful breathing  *Sharing reflections (writing)  *Strategies to keep practicing (speaking) | - |
